# Supplementary material for: A novel Meloidogyne graminicola effector, MgGPP, is secreted into host cells and undergoes glycosylation in concert with proteolysis to suppress plant defenses and promote parasitism
Source: PubMed Central journal article supplement (PMC5402989; doi:10.1371/journal.ppat.1006301), 2017-04-12
Supplement: ppat.1006301.s001.pdf [file ppat.1006301.s001.pdf]

**S1 Table. Primers used in this study.**

| Primer              | Sequence 5'-3'                          | Purpose                                                                                                   |
|---------------------|-----------------------------------------|-----------------------------------------------------------------------------------------------------------|
| MgGPP-race-F        | CAATTCAGTTATGGATGAAAC                   | <i>MgGPP</i> gene 3' flanking region PCR amplification                                                    |
| MgGPP-race-R        | AAGGCTCCACCAACAGCAGCA                   | <i>MgGPP</i> gene 5' flanking region PCR amplification                                                    |
| MgGPP-gDNA-F        | TAGTGAGTCGTATTACGGCC                    | <i>MgGPP</i> genomic fragment PCR amplification                                                           |
| MgGPP-gDNA-R        | GTTCTTCTTATATCTTCGAT                    |                                                                                                           |
| MgGPP-ORF-F         | ATGACAAAAATACTTCTTAC                    | <i>MgGPP</i> open reading frame region PCR amplification                                                  |
| MgGPP-ORF-R         | TTATTTTGACATTTTAGAT                     |                                                                                                           |
| Southern-F          | TGTCAGAAATACCTCAAATGGT                  | Southern blot probe amplification in <i>M. graminicola</i> or transgenic lines                            |
| Southern-R          | ACCACATTCACCACCATAAGCA                  |                                                                                                           |
| In-situ-HYBRID-F    | ACCAGTGCATAATTGTCCAGA                   | <i>In situ</i> hybridization assays in <i>M. graminicola</i>                                              |
| In-situ-HYBRID-R    | CGGAAAAGAAGGCTCCACCA                    |                                                                                                           |
| MgGPP-qPCR-F        | TTACGCCACAAGAGACTG                      | qRT-PCR for <i>MgGPP</i> expression patterns in <i>M. graminicola</i>                                     |
| MgGPP-qPCR-R        | CACATTCACCACCATAAGC                     |                                                                                                           |
| GUS-qPCR-F          | TTCTTGGTTAGGACCTTT                      | qRT-PCR for <i>gus</i> intron expression in RNAi lines                                                    |
| GUS-qPCR-R          | AGTTCGTCGGTTCTGTAA                      |                                                                                                           |
| GUS-F               | AAGCTTGATAGTCTGAGGGTAAA                 | GUS intron region PCR amplification                                                                       |
| GUS-R               | CTGCAGCTAGTTCGTCGGTTCTGTAA              |                                                                                                           |
| Mg-CRT-F            | TTCTTCTTCTCCTTCA                        | qRT-PCR for <i>MgCRT</i> expression in <i>M. graminicola</i> affecting RNAi lines                         |
| Mg-CRT-R            | GTGCTGTTGGTATTGATA                      |                                                                                                           |
| Mg-EXPANSION-F      | CTCAGGCTCTTATTTACATCA                   | qRT-PCR for <i>Mg-expansion</i> expression in <i>M. graminicola</i> affecting RNAi lines                  |
| Mg-EXPANSION-R      | TTGCATTCAGGACATTG                       |                                                                                                           |
| Mg-ACT2-F           | ATGGCAACTGCCGCTTCTTCT                   | <i>M. graminicola</i> housekeeping gene ( <i>ACT2</i> ) used as qRT-PCR reference                         |
| Mg-ACT2-R           | AGATTCGGACAACGGAAGCGT                   |                                                                                                           |
| pET32a-MgGPP-F      | GGATCCATGGAATCAAAAAATATAAAC             | pET32a:MgGPP constructed for prokaryotic expression                                                       |
| pET32a-MgGPP-R      | GAATTC TACTTGTACAGCTCGTCCA              |                                                                                                           |
| <i>NbEF1α</i> -F    | AAGGTCAGTATGCCTGGGTGCTTGAC              | <i>Nicotiana benthamiana</i> housekeeping gene ( <i>NbEF1α</i> ) amplification, used as qRT-PCR reference |
| <i>NbEF1α</i> -R    | AAGAATTCACAGGACAGTTCCAATACCA            |                                                                                                           |
| MgGPP-BamHI-F       | GGATCCATGGAATCAAAAAATATAAAC             | MgGPP <sup>Δ</sup> :eGFP constructed for transient expression assays in rice protoplasts                  |
| MgGPP-PstI-R        | CTGCAGCTTGTACAGCTCGTCCA                 |                                                                                                           |
| eGFP-PstI-F         | CTGCAGGTGAGCAAGGGCGAGGAGCT              | eGFP:MgGPP <sup>Δ</sup> constructed for transient expression assays in rice protoplasts                   |
| eGFP-MluI-R         | ACGCGTTTACTTGTACAGCTCGTCCA              |                                                                                                           |
| MgGPP-PstI-F        | CTGCAGGAAATCAAAAAATATAAAC               | eGFP:MgGPP <sup>Δ</sup> constructed for transient expression assays in rice protoplasts                   |
| MgGPP-MluI-R        | ACGCGTTTATTTTGACATTTTAGAT               |                                                                                                           |
| eGFP-BamHI-F        | GGATCCATGGTGAGCAAGGGCGAGGAGCT           | Ubi:eGFP constructed for transient expression assays in rice protoplasts                                  |
| eGFP-PstI-R         | CTGCAGTTACTTGTACAGCTCGTCCA              |                                                                                                           |
| Ubi-eGFP-BamHI-F    | CTGCAGATGGTGAGCAAGGGCGAGGAGCT           | Ubi:eGFP constructed for transient expression assays in rice protoplasts                                  |
| Ubi-eGFP-MluI-R     | ACGCGTTTACTTGTACAGCTCGTCCA              |                                                                                                           |
| Ubi-mCherry-BamHI-F | GGATCCATGGTGAGCAAGGGCGAGGA              | Ubi:mCherry constructed for transient expression assays in rice protoplasts                               |
| Ubi-mCherry-MluI-R  | ACGCGTTTACTTGTACAGCTCGTCCAT             |                                                                                                           |
| WAKA2ss-F           | ATGAAGGTACAGGAGGGTTT                    | WAKA2ss amplification                                                                                     |
| WAKA2ss-R           | CCTCCTCGCCCTTGCTCACCATGGATCCGACTCCTTGCG |                                                                                                           |

|                                                        |                                                         |                                                                                                                           |
|--------------------------------------------------------|---------------------------------------------------------|---------------------------------------------------------------------------------------------------------------------------|
| WAKA2ss-mCherry-HDEL-F                                 | GTTGTTAGGTGTTACTTCTGAAGAG<br>ATGAAGGTACAGGAGGGTTTGTTTC  | WAKA2ss:mCherry:HDEL constructed for transient expression assays in rice protoplasts                                      |
| WAKA2ss-mCherry-HDEL-R                                 | TGGTCACCAATTCACAAAACGCGTTTACAGCTCGTCAT<br>GAGATCTACGCGT |                                                                                                                           |
| MgGPP <sup>sp</sup> -eGFP-HDEL-F                       | <b>GGATCC</b> TTTTGGACATTTTAGATAAG                      | WAKA2ss:MgGPP <sup>Δ</sup> <sup>sp</sup> :eGFP:HDEL constructed for transient expression assays in rice protoplasts       |
| MgGPP <sup>Δ</sup> <sub>sp_Δ123-224</sub> -eGFP-HDEL-R | <b>GGATCC</b> ACCACATTCACCACCATAAG                      | WAKA2ss:MgGPP <sup>Δsp_Δ123-224</sup> :eGFP:HDEL constructed for transient expression assays in rice protoplasts          |
| MgGPP <sup>Δsp-N110Q</sup> -F                          | ATTTTTATTTTCATGCGTATCAGGACAGTGATAAACATG<br>CTTA         | eGFP:MgGPP <sup>Δsp-N110Q</sup> constructed for transient expression assays in rice protoplasts and <i>N. benthamiana</i> |
| MgGPP <sup>Δsp-N110Q</sup> -R                          | CTGATACGCATGAAAATAAAAAATTC                              |                                                                                                                           |
| MgGPP <sup>Δsp_Δ121-224</sup> -eGFP-R                  | <b>CTGCAG</b> TTCACCACCATAAGCATGTTTAT                   | MgGPP <sup>Δsp_Δ121-224</sup> -eGFP constructed for transient expression assays in rice protoplasts                       |
| MgGPP <sup>Δsp_Δ141-224</sup> -eGFP-R                  | <b>CTGCAG</b> ACCGGAAAAGAAGGCTCCACCAAC                  | MgGPP <sup>Δsp_Δ141-224</sup> -eGFP constructed for transient expression assays in rice protoplasts                       |
| MgGPP <sup>Δsp_Δ161-224</sup> -eGFP-R                  | <b>CTGCAG</b> ATCATGTATAGAATGATATGAA                    | MgGPP <sup>Δsp_Δ161-224</sup> -eGFP constructed for transient expression assays in rice protoplasts                       |
| MgGPP <sup>Δsp-200-224</sup> -eGFP-R                   | <b>CTGCAG</b> TGCCCTCAGATAAATCAAGT                      | MgGPP <sup>Δsp_Δ200-224</sup> :eGFP constructed for transient expression assays in rice protoplasts                       |
| MgGPP <sup>Δsp_Δ122-224</sup> -eGFP-R                  | <b>CTGCAG</b> ACATTCACCACCATAAGCATGTTTAT                | MgGPP <sup>Δsp_Δ122-224</sup> :eGFP constructed for transient expression assays in rice protoplasts                       |
| MgGPP <sup>Δsp_Δ123-224</sup> -eGFP-R                  | <b>CTGCAG</b> ACCACATTCACCACCATAAGCAT                   | MgGPP <sup>Δsp_Δ123-224</sup> :eGFP constructed for transient expression assays in rice protoplasts                       |
| MgGPP <sup>Δsp_Δ124-224</sup> -eGFP-R                  | <b>CTGCAG</b> TAGACCACATTCACCACCATAAG                   | MgGPP <sup>Δsp_Δ124-224</sup> :eGFP constructed for transient expression assays in rice protoplasts                       |
| MgGPP <sup>Δsp_Δ125-224</sup> -eGFP-R                  | <b>CTGCAG</b> TCCTAGACCACATTCACCACCAT                   | MgGPP <sup>Δsp_Δ125-224</sup> :eGFP constructed for transient expression assays in rice protoplasts                       |
| MgGPP <sup>Δsp_Δ126-224</sup> -eGFP-R                  | <b>CTGCAG</b> TACTCCTAGACCACATTCACCAC                   | MgGPP <sup>Δsp_Δ126-224</sup> :eGFP constructed for transient expression assays in rice protoplast                        |
| MgGPP <sup>Δsp_Δ121-140</sup> -eGFP-F                  | GCAACAAAAAATTGGCCCCG                                    | MgGPP <sup>Δsp_Δ121-140</sup> :eGFP constructed for transient expression assays in rice protoplasts                       |
| MgGPP <sup>Δsp_Δ121-140</sup> -eGFP-R                  | CGGGGCCAATTTTTGTTGCTTCACCACCATAAGCATG                   | MgGPP <sup>Δsp_Δ121-140</sup> :eGFP constructed for transient expression assays in rice protoplasts                       |
| MgGPP <sup>Δsp_Δ121-160</sup> -eGFP-F                  | GAAAAGGTTTGCATAGATAT                                    | MgGPP <sup>Δsp_Δ121-160</sup> :eGFP constructed for transient expression assays in rice protoplasts                       |
| MgGPP <sup>Δsp_Δ121-160</sup> -eGFP-R                  | ATATCTATGCAAACCTTTTCTTCACCACCATAAGCATG                  | MgGPP <sup>Δsp_Δ121-160</sup> :eGFP constructed for transient expression assays in rice protoplasts                       |
| MgGPP <sup>Δsp_Δ121-200</sup> -eGFP-F                  | TTAATTGGTTAAACCTGA                                      | MgGPP <sup>Δsp_Δ121-200</sup> :eGFP constructed for transient expression assays in rice protoplasts                       |
| MgGPP <sup>Δsp_Δ121-200</sup> -eGFP-R                  | TCAGGTTTTAACCAATTAAATTCACCACCATAAGCATG                  | MgGPP <sup>Δsp_Δ121-200</sup> :eGFP constructed for transient expression assays in rice protoplasts                       |
| eGFP-MgGPP <sup>Δsp_Δ123-224</sup> -R                  | <b>ACGCGT</b> TTATTCACCACCATAAGCATGTTTAT                | eGFP:MgGPP <sup>Δsp_Δ123-224</sup> constructed for transient expression assays in rice protoplasts                        |

|                                                 |                                                                                    |                                                                                                                                                |
|-------------------------------------------------|------------------------------------------------------------------------------------|------------------------------------------------------------------------------------------------------------------------------------------------|
| pCAMBIA1305-GrCLE12-F                           | AAGCTTGGCACTGGCCGTCGT                                                              | pCAMBIA1305:GrCLE12 constructed for cell death assays in <i>N. benthamiana</i>                                                                 |
| pCAMBIA1305-GrCLE12-R                           | CACGTGTTATCAGTGGTTCTCGCACTCGCAGGGTCCATG<br>TCCACCAATCATGGTCAAGAGTCCCCCG            |                                                                                                                                                |
| pCAMBIA1305-MgGPP-F                             | CCATGGCCGATTACAAGGATGACGACGATAAGTGAGTTT<br>AAACGAAATCAAAAAATATAAC                  | pCAMBIA1305:flag:MgGPP <sup>Δsp</sup> and pCAMBIA1305-MgGPP <sup>Δsp-N110Q</sup> -R constructed for cell death assays in <i>N. benthamiana</i> |
| pCAMBIA1305-MgGPP-R                             | CACGTGTTATTTGGACATTTTAGAT                                                          |                                                                                                                                                |
| pCAMBIA1305-MgGPP <sup>Δsp_Δ123-2</sup><br>24-R | CACGTGTTAACACATTACCACCATAAGCAT                                                     | pCAMBIA1305:flag:MgGPP <sup>Δsp_Δ123-224</sup> constructed for cell death assays in <i>N. benthamiana</i>                                      |
| pCAMBIA1305-Bax-F                               | CCATGGATGGACGGGTCCGGGGAGC                                                          | pCAMBIA1305:Bax constructed for cell death assays in <i>N. benthamiana</i>                                                                     |
| pCAMBIA1305-Bax-R                               | CACGTGTTAGCCCATCTTCTCCAGATGG                                                       |                                                                                                                                                |
| pCAMBIA1305-RBP-1-F                             | GAACACGGGGGACTCTTGACCATGATGCGCACCTTTC<br>TCTTCTC                                   | pCAMBIA1305:RBP-1:HA constructed for cell death assays in <i>N. benthamiana</i>                                                                |
| pCAMBIA1305-RBP-1-R                             | TCGAGCTGGTCACCAATTCACACGTGAGCGTAATCTGGA<br>ACATCGTATGGGTATAAATTCTCGTTTTTCAGTTTC    |                                                                                                                                                |
| pCAMBIA1305-Gpa2-F                              | GAACACGGGGGACTCTTGACCATGGCTTATGCTGC<br>TGTTAC                                      | pCAMBIA1305-Gpa2 constructed for cell death assays in <i>N. benthamiana</i>                                                                    |
| pCAMBIA1305-Gpa2-R                              | CGAGCTGGTCACCAATTCACACGTGTCACACTACCAAAA<br>ATGCTCCAT                               |                                                                                                                                                |
| pCAMBIA1305-INF1-F                              | GAACACGGGGGACTCTTGACCATGAACTTTCGTGCTCT<br>GTTCG                                    | pCAMBIA1305:INF1:HA constructed for cell death assays in <i>N. benthamiana</i>                                                                 |
| pCAMBIA1305-INF1-R                              | TCGAGCTGGTCACCAATTCACACGTGAGCGTAATCTGGA<br>ACATCGTATGGGTACACGTGTAGCGATGCACACGTAGAC |                                                                                                                                                |
| MgGPP-F                                         | TGTCCAGAAATACCCTCAAAT                                                              | <i>MgGPP</i> gene amplified in cell death assays in <i>N. benthamiana</i>                                                                      |
| MgGPP-R                                         | CAGTCTCTTGTGGCGTAAA                                                                |                                                                                                                                                |
| OsUBQ-F                                         | CCAGTAAGTCCTCAGCCATGGAG                                                            | Rice housekeeping gene ( <i>OsUBQ</i> , Os03g13170) used as qRT-PCR reference                                                                  |
| OsUBQ-R                                         | GGACACAATGATTAGGGATC                                                               |                                                                                                                                                |

Restriction enzyme sequences are in red font.
